# Supplementary material for: Perinatal Lead (Pb) Exposure Results in Sex-Specific Effects on Food Intake, Fat, Weight, and Insulin Response across the Murine Life-Course
Source: PLoS One. 2014 Aug 8;9(8):e104273. doi: 10.1371/journal.pone.0104273 (PMC4126699; doi:10.1371/journal.pone.0104273)
Supplement: File S1 — Physiological measurement statistics. Means and standard deviations for physiological parameters by sex, exposure, and measurement time point. (XLS) [file pone.0104273.s003.xls]

## Sheet: outcomesSEs
Sex	MMOC_Visit	Exposure	Estimate	StdErr	outcome	mean+/-StdErr
f	1	0	23.1667	0.709514	body weight	23.2±0.7
f	1	2.1	22.2912	0.776529	body weight	22.3±0.8
f	1	16	22.5358	0.645098	body weight	22.5±0.6
f	1	32	23.5115	0.734672	body weight	23.5±0.7
f	2	0	28.0572	1.13574	body weight	28.1±1.1
f	2	2.1	27.1593	1.2337	body weight	27.2±1.2
f	2	16	27.3133	1.05486	body weight	27.3±1.1
f	2	32	28.5781	1.14623	body weight	28.6±1.1
f	3	0	32.4722	1.43583	body weight	32.5±1.4
f	3	2.1	31.8426	1.52654	body weight	31.8±1.5
f	3	16	31.1181	1.32033	body weight	31.1±1.3
f	3	32	31.7012	1.44947	body weight	31.7±1.4
m	1	0	30.3346	0.870951	body weight	30.3±0.9
m	1	2.1	29.4653	0.948283	body weight	29.5±0.9
m	1	16	31.0181	0.878353	body weight	31±0.9
m	1	32	32.1107	0.878353	body weight	32.1±0.9
m	2	0	36.2017	1.19881	body weight	36.2±1.2
m	2	2.1	37.5768	1.30481	body weight	37.6±1.3
m	2	16	38.9388	1.20917	body weight	38.9±1.2
m	2	32	39.162	1.22415	body weight	39.2±1.2
m	3	0	40.7881	1.09714	body weight	40.8±1.1
m	3	2.1	41.874	1.17816	body weight	41.9±1.2
m	3	16	43.8469	1.10874	body weight	43.8±1.1
m	3	32	43.2907	1.13344	body weight	43.3±1.1
f	1	0	2.62358	0.331583	fat	2.62±0.33
f	1	2.1	2.38095	0.361888	fat	2.38±0.36
f	1	16	2.59269	0.301415	fat	2.59±0.3
f	1	32	2.61727	0.343693	fat	2.62±0.34
f	2	0	4.65196	0.587938	fat	4.65±0.59
f	2	2.1	3.95436	0.626179	fat	3.95±0.63
f	2	16	4.32747	0.541079	fat	4.33±0.54
f	2	32	4.45496	0.593559	fat	4.45±0.59
f	3	0	6.74787	0.822767	fat	6.75±0.82
f	3	2.1	6.10041	0.846328	fat	6.1±0.85
f	3	16	6.04838	0.745316	fat	6.05±0.75
f	3	32	5.91463	0.827661	fat	5.91±0.83
m	1	0	3.09634	0.377534	fat	3.1±0.38
m	1	2.1	3.19137	0.406937	fat	3.19±0.41
m	1	16	3.7597	0.38165	fat	3.76±0.38
m	1	32	4.01242	0.38165	fat	4.01±0.38
m	2	0	5.52634	0.557715	fat	5.53±0.56
m	2	2.1	6.52739	0.598452	fat	6.53±0.6
m	2	16	7.07336	0.563509	fat	7.07±0.56
m	2	32	6.75371	0.576345	fat	6.75±0.58
m	3	0	7.77222	0.542458	fat	7.77±0.54
m	3	2.1	8.55625	0.575364	fat	8.56±0.58
m	3	16	9.26667	0.542458	fat	9.27±0.54
m	3	32	8.50588	0.558185	fat	8.51±0.56
f	1	0	17.1219	0.37065	lean	17.12±0.37
f	1	2.1	16.6445	0.402402	lean	16.64±0.4
f	1	16	16.5852	0.336752	lean	16.59±0.34
f	1	32	17.4778	0.384804	lean	17.48±0.38
f	2	0	19.1523	0.476847	lean	19.15±0.48
f	2	2.1	19.267	0.512994	lean	19.27±0.51
f	2	16	18.9147	0.440887	lean	18.91±0.44
f	2	32	19.6402	0.481445	lean	19.64±0.48
f	3	0	20.8846	0.47829	lean	20.88±0.48
f	3	2.1	20.9789	0.503689	lean	20.98±0.5
f	3	16	20.4791	0.437904	lean	20.48±0.44
f	3	32	21.1227	0.482554	lean	21.12±0.48
m	1	0	22.5257	0.444881	lean	22.53±0.44
m	1	2.1	21.577	0.482129	lean	21.58±0.48
m	1	16	22.3887	0.449368	lean	22.39±0.45
m	1	32	23.1602	0.449368	lean	23.16±0.45
m	2	0	25.1007	0.499441	lean	25.1±0.5
m	2	2.1	25.0974	0.543358	lean	25.1±0.54
m	2	16	25.692	0.503842	lean	25.69±0.5
m	2	32	26.0313	0.510257	lean	26.03±0.51
m	3	0	26.7369	0.498303	lean	26.74±0.5
m	3	2.1	26.6405	0.540379	lean	26.64±0.54
m	3	16	27.6691	0.503238	lean	27.67±0.5
m	3	32	27.6843	0.510892	lean	27.68±0.51
f	1	0	2.01807	0.0881758	foodintake	2.02±0.09
f	1	2.1	2.22222	0.0969165	foodintake	2.22±0.1
f	1	16	2.14428	0.080189	foodintake	2.14±0.08
f	1	32	2.2263	0.0911354	foodintake	2.23±0.09
f	2	0	2.03275	0.10298	foodintake	2.03±0.1
f	2	2.1	2.15397	0.111509	foodintake	2.15±0.11
f	2	16	2.27211	0.0955037	foodintake	2.27±0.1
f	2	32	2.28177	0.10395	foodintake	2.28±0.1
f	3	0	2.12153	0.118468	foodintake	2.12±0.12
f	3	2.1	2.37767	0.130938	foodintake	2.38±0.13
f	3	16	2.30798	0.110948	foodintake	2.31±0.11
f	3	32	2.62765	0.119311	foodintake	2.63±0.12
m	1	0	2.21417	0.0725542	foodintake	2.21±0.07
m	1	2.1	2.21437	0.0780418	foodintake	2.21±0.08
m	1	16	2.17674	0.0733396	foodintake	2.18±0.07
m	1	32	2.33395	0.0733396	foodintake	2.33±0.07
m	2	0	2.35518	0.0758631	foodintake	2.36±0.08
m	2	2.1	2.40057	0.0818985	foodintake	2.4±0.08
m	2	16	2.39571	0.0766828	foodintake	2.4±0.08
m	2	32	2.7188	0.0781072	foodintake	2.72±0.08
m	3	0	2.54669	0.150713	foodintake	2.55±0.15
m	3	2.1	2.69137	0.165535	foodintake	2.69±0.17
m	3	16	2.27295	0.151328	foodintake	2.27±0.15
m	3	32	2.5807	0.152116	foodintake	2.58±0.15
f	1	0	0.913415	0.0137219	rer	0.91±0.01
f	1	2.1	0.939851	0.0154538	rer	0.94±0.02
f	1	16	0.91806	0.0124501	rer	0.92±0.01
f	1	32	0.918708	0.0138935	rer	0.92±0.01
f	2	0	0.84581	0.0191666	rer	0.85±0.02
f	2	2.1	0.881343	0.0199184	rer	0.88±0.02
f	2	16	0.864306	0.0174429	rer	0.86±0.02
f	2	32	0.884839	0.0193102	rer	0.88±0.02
f	3	0	0.871078	0.0168462	rer	0.87±0.02
f	3	2.1	0.886361	0.0183864	rer	0.89±0.02
f	3	16	0.880263	0.0156816	rer	0.88±0.02
f	3	32	0.875194	0.016995	rer	0.88±0.02
m	1	0	0.924936	0.0142255	rer	0.92±0.01
m	1	2.1	0.927187	0.015669	rer	0.93±0.02
m	1	16	0.916889	0.0142592	rer	0.92±0.01
m	1	32	0.937885	0.0142592	rer	0.94±0.01
m	2	0	0.894236	0.0126598	rer	0.89±0.01
m	2	2.1	0.921579	0.0138549	rer	0.92±0.01
m	2	16	0.915804	0.0127369	rer	0.92±0.01
m	2	32	0.913536	0.0128396	rer	0.91±0.01
m	3	0	0.898345	0.0162356	rer	0.9±0.02
m	3	2.1	0.889029	0.0176504	rer	0.89±0.02
m	3	16	0.859453	0.0163832	rer	0.86±0.02
m	3	32	0.854683	0.016601	rer	0.85±0.02
f	1	0	3980.87	303.09	vco	3981±303
f	1	2.1	4685.64	337.893	vco	4686±338
f	1	16	4944.72	275.543	vco	4945±276
f	1	32	4539.68	310.4	vco	4540±310
f	2	0	3615.73	190.778	vco	3616±191
f	2	2.1	3566.83	198.213	vco	3567±198
f	2	16	4007.43	173.601	vco	4007±174
f	2	32	4355.97	192.201	vco	4356±192
f	3	0	3099.65	207.244	vco	3100±207
f	3	2.1	3461.62	231.332	vco	3462±231
f	3	16	3408.53	195.037	vco	3409±195
f	3	32	3507.96	208.279	vco	3508±208
m	1	0	3598.45	182.051	vco	3598±182
m	1	2.1	3650.05	198.309	vco	3650±198
m	1	16	3525.37	183.563	vco	3525±184
m	1	32	3682.48	183.563	vco	3682±184
m	2	0	3135.77	153.763	vco	3136±154
m	2	2.1	3108.41	165.835	vco	3108±166
m	2	16	3098.03	155.436	vco	3098±155
m	2	32	3171.74	158.433	vco	3172±158
m	3	0	2972.54	134.721	vco	2973±135
m	3	2.1	2691.11	143.826	vco	2691±144
m	3	16	2493.26	135.783	vco	2493±136
m	3	32	2489.03	139.299	vco	2489±139
f	1	0	4421.03	308.682	vo	4421±309
f	1	2.1	5023.21	342.273	vo	5023±342
f	1	16	5464.99	280.731	vo	5465±281
f	1	32	4990.81	317.447	vo	4991±317
f	2	0	4348.98	218.052	vo	4349±218
f	2	2.1	4021.74	219.849	vo	4022±220
f	2	16	4653.86	195.753	vo	4654±196
f	2	32	4960.17	218.481	vo	4960±218
f	3	0	3572.86	215.335	vo	3573±215
f	3	2.1	3911.68	240.816	vo	3912±241
f	3	16	3872.89	202.842	vo	3873±203
f	3	32	4026.43	216.306	vo	4026±216
m	1	0	3920.73	172.369	vo	3921±172
m	1	2.1	4018.8	186.936	vo	4019±187
m	1	16	3876.44	174.073	vo	3876±174
m	1	32	3957.14	174.073	vo	3957±174
m	2	0	3552.39	154.468	vo	3552±154
m	2	2.1	3421	166.346	vo	3421±166
m	2	16	3401.37	156.152	vo	3401±156
m	2	32	3530.3	159.328	vo	3530±159
m	3	0	3326.44	142.676	vo	3326±143
m	3	2.1	3022.32	153.173	vo	3022±153
m	3	16	2865.83	144.176	vo	2866±144
m	3	32	2885.74	147.414	vo	2886±147
f	1	0	3222.11	276.744	xactivity	3222±277
f	1	2.1	2998.48	312.778	xactivity	2998±313
f	1	16	2854.23	250.759	xactivity	2854±251
f	1	32	2686.05	278.6	xactivity	2686±279
f	2	0	2923.73	268.928	xactivity	2924±269
f	2	2.1	3042.87	302.29	xactivity	3043±302
f	2	16	2815.42	253.981	xactivity	2815±254
f	2	32	2880.27	269.745	xactivity	2880±270
f	3	0	2590.44	221.713	xactivity	2590±222
f	3	2.1	3152.23	246.394	xactivity	3152±246
f	3	16	2725.69	208.198	xactivity	2726±208
f	3	32	2890.6	223.05	xactivity	2891±223
m	1	0	2502.25	147.457	xactivity	2502±147
m	1	2.1	2331.5	160.908	xactivity	2332±161
m	1	16	2161.11	148.566	xactivity	2161±149
m	1	32	2181.79	148.566	xactivity	2182±149
m	2	0	2272.03	143.428	xactivity	2272±143
m	2	2.1	2201.33	155.512	xactivity	2201±156
m	2	16	2237.6	144.855	xactivity	2238±145
m	2	32	2261.28	147.077	xactivity	2261±147
m	3	0	2423.65	117.757	xactivity	2424±118
m	3	2.1	2153.05	127.129	xactivity	2153±127
m	3	16	2256.31	119.029	xactivity	2256±119
m	3	32	2238	121.237	xactivity	2238±121
f	1	0	1849.84	197.137	xambulatory	1850±197
f	1	2.1	1689.65	222.657	xambulatory	1690±223
f	1	16	1565.51	178.679	xambulatory	1566±179
f	1	32	1457.21	198.695	xambulatory	1457±199
f	2	0	1619.13	201.066	xambulatory	1619±201
f	2	2.1	1664.85	226.023	xambulatory	1665±226
f	2	16	1555.74	189.896	xambulatory	1556±190
f	2	32	1566.28	201.673	xambulatory	1566±202
f	3	0	1365.94	163.212	xambulatory	1366±163
f	3	2.1	1735.07	181.693	xambulatory	1735±182
f	3	16	1417.63	153.393	xambulatory	1418±153
f	3	32	1606.12	164.133	xambulatory	1606±164
m	1	0	1358.86	108.5	xambulatory	1359±109
m	1	2.1	1241.22	118.14	xambulatory	1241±118
m	1	16	1169.4	109.42	xambulatory	1169±109
m	1	32	1142.07	109.42	xambulatory	1142±109
m	2	0	1225.33	102.54	xambulatory	1225±103
m	2	2.1	1136.63	111.254	xambulatory	1137±111
m	2	16	1214.96	103.54	xambulatory	1215±104
m	2	32	1230.14	105.076	xambulatory	1230±105
m	3	0	1289.09	95.8805	xambulatory	1289±96
m	3	2.1	1116.41	104.132	xambulatory	1116±104
m	3	16	1199.3	96.7856	xambulatory	1199±97
m	3	32	1183.85	98.1472	xambulatory	1184±98
f	1	0	1292.22	172.795	zactivity	1292±173
f	1	2.1	1212.31	194.873	zactivity	1212±195
f	1	16	1123.26	156.706	zactivity	1123±157
f	1	32	1067.24	174.589	zactivity	1067±175
f	2	0	1126.01	143.183	zactivity	1126±143
f	2	2.1	1117.8	158.264	zactivity	1118±158
f	2	16	1041.68	134.099	zactivity	1042±134
f	2	32	1110.42	144.2	zactivity	1110±144
f	3	0	958.604	150.223	zactivity	959±150
f	3	2.1	1218.51	166.312	zactivity	1219±166
f	3	16	1005.34	140.802	zactivity	1005±141
f	3	32	1045.67	151.245	zactivity	1046±151
m	1	0	834.704	66.9494	zactivity	835±67
m	1	2.1	760.865	71.763	zactivity	761±72
m	1	16	728.795	67.6229	zactivity	729±68
m	1	32	746.498	67.6229	zactivity	746±68
m	2	0	799.51	62.2819	zactivity	800±62
m	2	2.1	774.638	66.0599	zactivity	775±66
m	2	16	879.897	62.2819	zactivity	880±62
m	2	32	794.854	64.0875	zactivity	795±64
m	3	0	788.336	67.4535	zactivity	788±67
m	3	2.1	763.281	72.0365	zactivity	763±72
m	3	16	922.659	68.0019	zactivity	923±68
m	3	32	845.173	69.7499	zactivity	845±70
Sex	Age Range (weeks)	Exposure	Estimate	StdErr	outcome	mean+/-StdErr
m	1-9	0	24.6308	1.7122	weight at home facility	24.63±1.71
m	1-9	2.1	25.4998	1.7708	weight at home facility	25.5±1.77
m	1-9	16	26.0061	1.7122	weight at home facility	26.01±1.71
m	1-9	32	25.7284	1.7151	weight at home facility	25.73±1.72
m	12-22	0	35.1705	1.6642	weight at home facility	35.17±1.66
m	12-22	2.1	35.7949	1.7245	weight at home facility	35.79±1.72
m	12-22	16	38.5721	1.6654	weight at home facility	38.57±1.67
m	12-22	32	37.9338	1.6683	weight at home facility	37.93±1.67
m	24-35	0	40.1206	1.5721	weight at home facility	40.12±1.57
m	24-35	2.1	41.6208	1.6366	weight at home facility	41.62±1.64
m	24-35	16	43.9754	1.574	weight at home facility	43.98±1.57
m	24-35	32	43.3468	1.5761	weight at home facility	43.35±1.58
f	1-9	0	19.3256	1.587	weight at home facility	19.33±1.59
f	12-22	2.1	28.6127	1.5447	weight at home facility	28.61±1.54
f	24-35	16	33.8043	1.5484	weight at home facility	33.8±1.55
f	1-9	32	18.4446	1.534	weight at home facility	18.44±1.53
f	12-22	0	27.6215	1.4841	weight at home facility	27.62±1.48
f	24-35	2.1	32.7684	1.4872	weight at home facility	32.77±1.49
f	1-9	16	18.3994	1.7011	weight at home facility	18.4±1.7
f	12-22	32	26.9223	1.6629	weight at home facility	26.92±1.66
f	24-35	0	33.794	1.6587	weight at home facility	33.79±1.66
f	1-9	2.1	18.683	1.5885	weight at home facility	18.68±1.59
f	12-22	16	27.912	1.5573	weight at home facility	27.91±1.56
f	24-35	32	34.623	1.5427	weight at home facility	34.62±1.54
